# Supplementary material for: Characterizing single chain nanoparticles (SCNPs): a critical survey
Source: Royal Society of Chemistry journal article supplement (doi:10.1039/c7py01278k), 2017-01-01
Supplement: c7py01278k1.pdf [file c7py01278k1.pdf]

## Supporting Information

# Characterizing Single Chain Nanoparticles (SCNPs): A Critical Survey

Eva Blasco,<sup>‡b,c\*</sup> Bryan T. Tuten,<sup>‡a,b</sup> Hendrik Frisch,<sup>‡a</sup> Alben Lederer,<sup>d\*</sup>  
Christopher Barner-Kowollik<sup>a,b,c\*</sup>

<sup>a</sup> School of Chemistry, Physics and Mechanical Engineering, Faculty of Science and Technology, Queensland University of Technology, 2 George Street, QLD 4000, Australia.

<sup>b</sup> Preparative Macromolecular Chemistry, Institut für Technische Chemie und Polymerchemie, Karlsruhe Institute of Technology (KIT), Engesserstr. 18, 76131 Karlsruhe, Germany.

<sup>c</sup> Institut für Biologische Grenzflächen, Karlsruhe Institute of Technology (KIT), Hermann-von-Helmholtz-Platz 1, 76344 Eggenstein-Leopoldshafen, Germany.

<sup>d</sup> Leibniz Institute of Polymer Research Dresden, Hohe Str. 6, D-01069 Dresden, Germany.

<sup>‡</sup>*These authors contributed equally*

**Table S1.** Molecular weight and diameter of the SCNPs

| <b>Polymer</b> | <b><math>M_n</math> (g/mol)</b> | <b><math>D_M</math></b> | <b><math>D</math> (nm)</b> | <b>Technique</b> | <b>References</b> |
|----------------|---------------------------------|-------------------------|----------------------------|------------------|-------------------|
| <b>P1</b>      | 14000 <sup>a</sup>              | 1.19                    | 3.1                        | DLS              | [1]               |
| <b>P2</b>      | 14400 <sup>a</sup>              | 1.24                    | 4.5                        |                  |                   |
| <b>P3</b>      | 14000 <sup>a</sup>              | 1.30                    | 5.7                        |                  |                   |
| <b>P4</b>      | 12300                           | 1.16                    | 5.4                        | DLS              | [2]               |
| <b>P5</b>      | 15700                           | 1.19                    | 7.0                        | DLS              | [3]               |
| <b>P6</b>      | 16500                           | 1.33                    | 4.5                        |                  |                   |
| <b>P7</b>      | 20200                           | 1.56                    | 1.7                        |                  |                   |
| <b>P8</b>      | 19200                           | 1.28                    | 3.0                        |                  |                   |
| <b>P9</b>      | 30600                           | 1.10                    | 3.4                        | DLS              | [4]               |
|                |                                 |                         | 2.5                        | DOSY             |                   |
| <b>P10</b>     | 64800                           | 1.20                    | 6                          | DLS              |                   |
|                |                                 |                         | 7.1                        | DOSY             |                   |
| <b>P11</b>     | 64800                           | 1.20                    | 7.9                        | DLS              |                   |
|                |                                 |                         | 8.7                        | DOSY             |                   |
| <b>P12</b>     | 14900                           | 2.00                    | 3.8                        | DLS              | [5]               |
|                |                                 |                         | 3.3                        | DOSY             |                   |
| <b>P13</b>     | 15400                           | 1.11                    | 5.9                        | DLS              | [6]               |
| <b>P14</b>     | 20000                           | 1.50                    | 2.3                        | DLS              | [7]               |
| <b>P15</b>     | 12000                           | 1.20                    | 1.0                        |                  |                   |
| <b>P16</b>     | 15400                           | 1.12                    | 8.0                        | DLS              | [8]               |
| <b>P17</b>     | 9300                            | 1.24                    | 4.4                        | DLS              | [9]               |
| <b>P18</b>     | 9100                            | 1.23                    | 3.2                        |                  |                   |
| <b>P19</b>     | 24900                           | 1.12                    | 10.0                       | DLS              | [10]              |
| <b>P20</b>     | 67900                           | 1.43                    | 23.6                       |                  |                   |
| <b>P21</b>     | 48700                           | 1.84                    | 19.8                       |                  |                   |
| <b>P22</b>     | 23600                           | 1.17                    | 8.8                        |                  |                   |
| <b>P22</b>     | 28700                           | 1.17                    | 11.4                       |                  |                   |
| <b>P24</b>     | 57000                           | 1.26                    | 12.6                       |                  |                   |
| <b>P20</b>     | 67900                           | 1.43                    | 23.6                       |                  |                   |
| <b>P21</b>     | 48700                           | 1.84                    | 19.8                       |                  |                   |
| <b>P22</b>     | 23600                           | 1.17                    | 8.8                        |                  |                   |
| <b>P23</b>     | 28700                           | 1.17                    | 11.4                       |                  |                   |
| <b>P24</b>     | 57000                           | 1.26                    | 12.6                       |                  |                   |
| <b>P25</b>     | 27900                           | 1.97                    | 13.2                       | DLS              | [11]              |
| <b>P26</b>     | 24900                           | 1.67                    | 11.3                       |                  |                   |
| <b>P27</b>     | 24200                           | 1.86                    | 10.2                       |                  |                   |
| <b>P28</b>     | 46100                           | 2.45                    | 15.7                       |                  |                   |
| <b>P29</b>     | 46000                           | 2.87                    | 13.1                       |                  |                   |
| <b>P30</b>     | 14400                           | 1.13                    | 12                         | DLS              | [12]              |
| <b>P31</b>     | 26600                           | 1.15                    | 18.7                       |                  |                   |
| <b>P32</b>     | 48200                           | 1.38                    | 21.4                       |                  |                   |
| <b>P33</b>     | 24300                           | 1.01                    | 11.7                       |                  |                   |

| <b>Polymer</b> | <b><math>M_n</math> (g/mol)</b> | <b><math>D_M</math></b> | <b><math>D</math> (nm)</b> | <b>Technique</b> | <b>References</b> |
|----------------|---------------------------------|-------------------------|----------------------------|------------------|-------------------|
| <b>P34</b>     | 58800                           | 1.21                    | 10.1                       | DLS              | [13]              |
| <b>P35</b>     | 42100                           | 1.3                     | 9.4                        |                  |                   |
| <b>P36</b>     | 66400                           | 1.36                    | 8.7                        |                  |                   |
| <b>P37</b>     | 76900                           | 1.24                    | 8.5                        | DLS              | [14]              |
| <b>P38</b>     | 29400                           | 1.05                    | 5.3                        | DLS              | [15]              |
| <b>P39</b>     | 35800                           | 1.06                    | 5.7                        |                  |                   |
| <b>P40</b>     | 51000                           | 1.05                    | 6.8                        |                  |                   |
| <b>P41</b>     | 238000                          | 1.3                     | 14.1                       |                  |                   |
| <b>P42</b>     | 30000                           | 1.27                    | 17.8                       | DLS              | [16]              |
| <b>P43</b>     | 30000                           | 1.27                    | 17                         |                  |                   |
| <b>P44</b>     | 30000                           | 1.27                    | 16.2                       |                  |                   |
| <b>P45</b>     | 30000                           | 1.27                    | 14.8                       |                  |                   |
| <b>P46</b>     | 46000                           | 1.15                    | 13.1                       | DLS              | [17]              |
| <b>P47</b>     | 45000                           | 1.18                    | 11.3                       |                  |                   |
| <b>P48</b>     | 41100                           | 1.16                    | 10.5                       |                  |                   |
| <b>P49</b>     | 49600                           | 1.02                    | 18.8                       | DLS              | [18]              |
| <b>P50</b>     | 49600                           | 1.02                    | 17.2                       |                  |                   |
| <b>P51</b>     | 49600                           | 1.02                    | 15.8                       |                  |                   |
| <b>P52</b>     | 44000                           | 1.03                    | 19.2                       | DLS              | [18]              |
| <b>P53</b>     | 44000                           | 1.03                    | 18.2                       |                  |                   |
| <b>P54</b>     | 44000                           | 1.03                    | 16                         |                  |                   |
| <b>P55</b>     | 43400                           | -                       | 5                          | DLS              | [19]              |
| <b>P56</b>     | 48900                           | -                       | 4.7                        |                  |                   |
| <b>P57</b>     | 20800                           | 1.73                    | 8.6                        | DLS              | [20]              |
| <b>P58</b>     | 31300                           | 1.1                     | 4.2                        | DLS              | [21]              |
| <b>P59</b>     | 15000                           | 1.19                    | 9.6                        | DLS              | [22]              |
| <b>P60</b>     | 15000                           | 1.19                    | 9.0                        |                  |                   |
| <b>P61</b>     | 15000                           | 1.19                    | 8.6                        |                  |                   |
| <b>P62</b>     | 39100                           | 1.05                    | 6.4                        | DLS              | [23]              |
| <b>P63</b>     | 182000                          | 1.35                    | 12.5                       |                  |                   |
| <b>P64</b>     | 127200 <sup>a</sup>             | 1.39                    | 9.8                        | DLS              | [24]              |
| <b>P65</b>     | 124400 <sup>a</sup>             | 1.54                    | 7.2                        |                  |                   |
| <b>P66</b>     | 31800                           | 1.29                    | 5.5                        | DLS              | [25]              |
| <b>P67</b>     | 34200                           | 1.22                    | 6.0                        |                  |                   |
| <b>P68</b>     | 30600                           | 1.27                    | 6.0                        |                  |                   |
| <b>P69</b>     | 18100                           | 1.41                    | 16.0                       | DLS              | [26]              |
| <b>P70</b>     | 25800                           | 1.31                    | 13.2                       | DLS              | [27]              |
| <b>P71</b>     | 28600                           | 1.37                    | 12.2                       |                  |                   |
| <b>P72</b>     | 32200                           | 1.33                    | 11.4                       |                  |                   |
| <b>P73</b>     | 38500                           | 1.46                    | 10.2                       |                  |                   |
| <b>P74</b>     | 46900                           | 1.33                    | 17.4                       |                  |                   |

| <b>Polymer</b> | <b><math>M_n</math> (g/mol)</b> | <b><math>\bar{D}_M</math></b> | <b><math>D</math> (nm)</b> | <b>Technique</b> | <b>References</b> |
|----------------|---------------------------------|-------------------------------|----------------------------|------------------|-------------------|
| <b>P75</b>     | 53300                           | 1.38                          | 15.6                       | DLS              | [27]              |
| <b>P76</b>     | 60400                           | 1.31                          | 14.2                       |                  |                   |
| <b>P77</b>     | 64600                           | 1.48                          | 13.6                       |                  |                   |
| <b>P78</b>     | 80200                           | 1.45                          | 23.6                       |                  |                   |
| <b>P79</b>     | 91300                           | 1.62                          | 21.2                       |                  |                   |
| <b>P80</b>     | 15200                           | 1.35                          | 8.6                        | DLS              | [28]              |
| <b>P81</b>     | 9900                            | 1.08                          | 7.6                        |                  |                   |
| <b>P82</b>     | 22000                           | 1.32                          | 11.0                       |                  |                   |
| <b>P83</b>     | 32000                           | 1.35                          | 13.0                       |                  |                   |
| <b>P84</b>     | 29000                           | 1.34                          | 12.4                       |                  |                   |
| <b>P85</b>     | 32000                           | 1.29                          | 10.8                       |                  |                   |
| <b>P86</b>     | 88000                           | 1.45                          | 26.2                       |                  |                   |
| <b>P87</b>     | 108000                          | 1.60                          | 18.4                       |                  |                   |
| <b>P88</b>     | 27900                           | 1.30                          | 1.2                        | DLS              | [29]              |
| <b>P89</b>     | 27800                           | 1.30                          | 1.0                        |                  |                   |
| <b>P90</b>     | 27900                           | 1.20                          | 1.1                        |                  |                   |
| <b>P91</b>     | 30100                           | 1.30                          | 1.0                        |                  |                   |
| <b>P92</b>     | 57100                           | 1.10                          | 7.0                        | DLS              | [30]              |
| <b>P93</b>     | 3000                            | --                            | 1.0                        | DLS              | [31]              |
| <b>P94</b>     | 34800                           | 1.08                          | 5.8                        | DLS              | [32]              |
|                |                                 |                               | 4.0                        | AFM              |                   |
| <b>P95</b>     | 34900                           | 1.11                          | 4.0                        | DLS              |                   |
|                |                                 |                               | 3.9                        | AFM              |                   |
| <b>P96</b>     | 31600                           | 1.19                          | 3.9                        | DLS              |                   |
|                |                                 |                               | 3.7                        | AFM              |                   |
| <b>P97</b>     | 30000                           | 1.20                          | 3.6                        | DLS              |                   |
|                |                                 |                               | 2.0                        | AFM              |                   |
| <b>P98</b>     | 59600                           | 2.40                          | 5.0-10.0                   | DLS              | [33]              |
|                |                                 |                               | 5.0-10.0                   | AFM              |                   |
| <b>P99</b>     | 8100                            | 4.80                          | 3.0-7.0                    | DLS              |                   |
|                |                                 |                               | 3.0-7.0                    | AFM              |                   |
| <b>P100</b>    | 40600                           | 1.15                          | 8.5                        | DLS              | [34]              |
|                |                                 |                               | 9.8                        | DOSY             |                   |
| <b>P101</b>    | 62000                           | 1.21                          | 7.3                        | DLS              | [35]              |
|                |                                 |                               | 4.3                        | TEM              |                   |
| <b>P102</b>    | 50000                           | 1.08                          | 1.5                        | AFM              | [36]              |
| <b>P103</b>    | 22400                           | 1.04                          | 7.0                        | DOSY             | [37]              |
| <b>P104</b>    | 26000                           | 1.20                          | 6.8                        | SEC (VI)         | [38]              |
| <b>P105</b>    | 24300                           | 1.20                          | 5.8                        |                  |                   |
| <b>P106</b>    | 24300                           | 1.20                          | 6.4                        |                  |                   |
| <b>P107</b>    | 17500                           | 1.20                          | 12.6                       | SEC (VI)         | [39]              |

| <b>Polymer</b> | <b><math>M_n</math> (g/mol)</b> | <b><math>D_M</math></b> | <b><math>D</math> (nm)</b> | <b>Tehnique</b> | <b>References</b> |
|----------------|---------------------------------|-------------------------|----------------------------|-----------------|-------------------|
| <b>P108</b>    | 11300                           | 1.20                    | 7.0                        | SEC (VI)        | [39]              |
| <b>P109</b>    | 34500                           | 1.60                    | 10.0                       |                 |                   |
| <b>P110</b>    | 16400                           | 1.70                    | 8.2                        |                 |                   |
| <b>P111</b>    | 32800                           | 1.08                    | 5.8                        | SEC (VI)        | [40]              |
| <b>P112</b>    | 35600                           | 1.05                    | 6.2                        |                 |                   |
| <b>P113</b>    | 26300                           | 1.17                    | 6.8                        | SEC (VI)        | [41]              |
| <b>P114</b>    | 26800                           | 1.14                    | 5.8                        |                 |                   |
| <b>P115</b>    | 37000                           | 1.16                    | 4.6                        |                 |                   |
| <b>P116</b>    | 41100                           | 1.22                    | 7.8                        | SEC (VI)        | [42]              |
| <b>P117</b>    | 105800                          | 1.04                    | 14.0                       | SEC (VI)        | [43]              |
| <b>P118</b>    | 105800                          | 1.04                    | 14.0                       |                 |                   |
| <b>P119</b>    | 82100                           | 1.10                    | 13.2                       |                 |                   |
| <b>P120</b>    | 82100                           | 1.10                    | 12.6                       |                 |                   |
| <b>P121</b>    | 162000                          | 1.08                    | 16.2                       |                 |                   |
| <b>P122</b>    | 162000                          | 1.08                    | 16.0                       |                 |                   |
| <b>P123</b>    | 198100                          | 1.05                    | 16.8                       |                 |                   |
| <b>P124</b>    | 198100                          | 1.05                    | 16.4                       |                 |                   |
| <b>P125</b>    | 24500 <sup>a</sup>              | 1.50                    | 7.4                        | SEC(VI)         | [44]              |
| <b>P126</b>    | 42600 <sup>a</sup>              | 1.60                    | 10.4                       |                 |                   |
| <b>P127</b>    | 49400                           | 1.19                    | 14.2                       | SEC (VI)        | [45]              |
| <b>P128</b>    | 50300                           | 1.31                    | 13.2                       |                 |                   |
| <b>P129</b>    | 64300                           | 1.24                    | 13.6                       |                 |                   |
| <b>P130</b>    | 73200                           | 1.21                    | 13.8                       |                 |                   |
| <b>P131</b>    | 70800                           | 1.34                    | 12.6                       |                 |                   |
| <b>P132</b>    | 25300                           | 1.21                    | 13.0                       |                 |                   |
| <b>P133</b>    | 27300                           | 1.25                    | 13.2                       |                 |                   |
| <b>P134</b>    | 26400                           | 1.33                    | 12.8                       |                 |                   |
| <b>P135</b>    | 25100                           | 1.27                    | 11.4                       |                 |                   |

<sup>a</sup>  $M_p$

## Comparison of the $D$ of SCNPs with proteins

To compare the dimension of SCNPs with their natural analogs, a set of data for different proteins<sup>[46]</sup> reporting  $R_g$  values as a function of the number of amino acid was analysed. For calculation of the molar mass of the proteins, an average molar mass of a nucleic acid of  $150 \text{ g mol}^{-1}$  was assumed. In order to use the hydrodynamic radius  $R_h$  in scaling relations, a transformation of  $R_g$  in  $R_h$  was applied using the relation

$$\rho = R_g / R_h \quad \text{Equation 1}$$

The  $\rho$ -parameter depends on the conformation of the macromolecules and corresponds to 0.778 for solid sphere.<sup>[47]</sup> Using this relationship, a transformation of the  $R_g(M)$  into  $D_h(M)$  dependence is performed.

## References

- [1] J. Willenbacher, K.N. R. Wuest, J. O. Mueller, M. Kaupp, H. A. Wagenknecht, C. Barner-Kowollik, *ACS Macro Lett.* **2014**, *3*, 574-579.
- [2] J. Willenbacher, O. Altintas, V. Trouillet, N. Knöfel, M. J. Monteiro, P. W. Roesky, C. Barner-Kowollik, *Polym. Chem.* **2015**, *6*, 4358-4365.
- [3] O. Altintas, J. Willenbacher, K. N. R. Wuest, K. K. Oehlenschlaeger, P. Krolla-Sidenstein, H. Gliemann, C. Barner-Kowollik, *Macromolecules* **2013**, *46*, 8092-810.
- [4] T. S. Fischer, D. Schulze-Sünninghausen, B. Luy, O. Altintas, C. Barner-Kowollik, *Angew. Chem. Int. Ed.* **2016**, *55*, 11276.
- [5] J. T. Offenloch, J. Willenbacher, P. Tzvetkova, C. Heiler, H. Mutlu, C. Barner-Kowollik, *Chem. Commun.* **2017**, *53*, 775-778.
- [6] O. Altintas, P. Krolla-Sidenstein, H. Gliemann, C. Barner-Kowollik, *Macromolecules* **2014**, *47*, 5877-5888.
- [7] C. Heiler, J. T. Offenloch, E. Blasco, C. Barner-Kowollik, *ACS Macro Lett.* **2017**, *6*, 56-61.
- [8] O. Altintas, E. Lejeune, P. Gerstel, C. Barner-Kowollik, *Polym. Chem.* **2012**, *3*, 640-651.
- [9] E. Blasco, B. Yameen, A. S. Quick, P. Krolla-Sidenstein, A. Welle, M. Wegener, C. Barner-Kowollik, *Macromolecules* **2015**, *48*, 8718-8728.
- [10] P. J. M. Stals, M. A. J. Gillissen, R. Nicola, A. R. A. Palmans, E. W. Meijer, *Polym. Chem.* **2013**, *4*, 2584-2597.
- [11] F. Wang, H. Pu, M. Jin, H. Pan, Z. Chang, D. Wan, J. Du, *J. Polym. Sci. Polym. Chem.* **2015**, *53*, 1832-1840.
- [12] E. A. Appel, J. Dyson, J. del Barrio, Z. Walsh, O. A. Scherman, *Angew. Chem., Int. Ed.* **2012**, *51*, 4185-4189.
- [13] F. Wang, H. Pu, X. Che, *Chem. Commun.* **2016**, *52*, 3516-3519.
- [14] C. Song, L. Li, L. Dai, S. Thayumanavan, *Polym. Chem.* **2015**, *6*, 4828-4834.
- [15] A. Sanchez-Sanchez, D. A. Fulton, J. A. Pomposo, *Chem. Commun.* **2014**, *50*, 1871-1874.
- [16] S. Mavila, C. E. Diesendruck, S. Linde, L. Amir, R. Shikler, N. G. Lemcoff, *Angew. Chem. Int. Ed.* **2013**, *52*, 5767-5770.
- [17] J. Jeong, Y. L. Lee, B. Kim, B. Kim, K. S. Jung, H. Paik, *Polym. Chem.* **2015**, *6*, 3392-3397.
- [18] S. Mavila, I. Rozenberg, N. G. Lemcoff, *Chem. Sci.* **2014**, *5*, 4196-4203.

- [19] F. Wang, H. Pu, M. Jin, D. Wan, *Macromol. Rapid Commun.* **2016**, *37*, 330-336.
- [20] J. Lu, N. ten Brummelhuis, M. Weck, *Chem. Commun.* **2014**, *50*, 6225-6227.
- [21] L. Oria, R. Aguado, J. A. Pomposo, J. Colmenero, *Adv. Mater.* **2010**, *22*, 3038-3041.
- [22] D. Chao, X. Jia, B. Tuten, C. Wang, E. B. Berda, *Chem. Commun.* **2013**, *49*, 4178-4180.
- [23] A. Sanchez-Sanchez, J. A. Pomposo, *J. Nanomater.* **2015**, *2015*, 723492.
- [24] I. Perez-Baena, I. Asenjo-Sanz, A. Arbe, A. J. Moreno, F. Lo Verso, J. Colmenero, J. A. Pomposo, *Macromolecules* **2014**, *47*, 8270-8280.
- [25] A. Ruiz de Luzuriaga, N. Ormategui, H. J. Grande, I. Odriozola, J. A. Pomposo, I. Loinaz, *Macromol. Rapid Commun.* **2008**, *29*, 1156-1160.
- [26] X. Jiang, H. Pu, P. Wang, *Polymer* **2011**, *52*, 3597-3602.
- [27] P. Wang, H. Pu, M. Jin, *J. Polym. Sci. Part A: Polym. Chem.* **2011**, *49*, 5133-5141.
- [28] D. Mecerreyes, V. Lee, C. J. Hawker, J. L. Hedrick, A. Wursh, W. Volksen, T. Magbitang, E. Huang, R. D. Miller, *Adv. Mater.* **2001**, *13*, 204-208.
- [29] T. K. Nguyen, S. J. Lam, K. K. Ho, N. Kumar, G. G. Qiao, S. Egan, C. Boyer, E. H. H. Wong, *ACS Infectious Diseases* **2017**, *3*, 237-248.
- [30] L. Buruaga, J. A. Pomposo, *Polymers* **2011**, *3*, 1673-1683.
- [31] J. Romulus, M. Weck, *Macromol. Rapid Commun.* **2013**, *34*, 1518-1523.
- [32] N. Ormategui, I. Garcia, D. Padro, G. Cabanero, H. J. Grande, I. Loinaza, *Soft Matter* **2012**, *8*, 734-740.
- [33] C. T. Adkins, H. Muchalski, E. Harth, *Macromolecules* **2009**, *42*, 5786-5792.
- [34] Knoefel, N.; Rothfuss, H.; Willenbacher, J.; Barner-Kowollik, C.; Roesky, P. *Angew. Chem. Int. Ed.* **2017**, *56*, 4950-4954.
- [35] J. N. Dobish, S. K. Hamilton, E. Harth, *Polym. Chem.* **2012**, *3*, 857-860.
- [36] I. Perez-Baena, I. Loinaz, D. Padro, I. Garcia, H. J. Grande, I. Odriozola, *J. Mater. Chem.* **2010**, *20*, 6916-6922.
- [37] A. M. Hanlon, R. Chen, K. J. Rodriguez, C. Willis, J. G. Dickinson, M. Cashman, E. B. Berda, *Macromolecules* **2017**, DOI: 10.1021/acs.macromol.7b00497.
- [38] C. K. Lyon, E. O. Hill, E. B. Berda, *Macromol. Chem. Phys.* **2016**, *217*, 501-508.
- [39] A. Prasher, C. M. Loynd, B. T. Tuten, P. G. Frank, D. Chao, E. B. Berda, *J. Polym. Sci., Part A: Polym. Chem.* **2016**, *54*, 209-217.
- [40] C. A. Tooley, S. Pazicni, E. B. Berda, *Polym. Chem.* **2015**, *6*, 7646-7651.



[41] P. G. Frank, B. T. Tuten, A. Prasher, D. Chao, E. B. Berda, *Macromol. Rapid Commun.* **2014**, *35*, 249-253.

[42] B. T. Tuten, D. Chao, C. K. Lyon, E. B. Berda, *Polym. Chem.* **2012**, *3*, 3068-3071.

[43] S. Basasoro, M. Gonzalez-Burgos, A. J. Moreno, F. Lo Verso , A. Arbe , J. Colmenero, J. A. Pomposo, *Macromol. Rapid Commun.* **2016**, *37*, 1060-1065.

[44] J. Rubio-Cervilla, F. Barroso-Bujans, J. A. Pomposo, *Macromolecules* **2016**, *49*, 90-97.

[45] A. M. Hanlon, I. Martin, E. Bright, J. Chouinard, K. Rodriguez, G. Patenotte, E. B. Berda, *Polym. Chem.* **2017**. DOI: 10.1039/C7PY00320J.

[46] L. Hong, J. Lei, *J. Polym Sci. Part B: Polym. Phys.* **2009**, *47*, 207-214.

[47] W. Burchard, *Adv. Polym. Sci.* **1999**, *143*, 113-194.
